# Supplementary material for: Combining Medicinal Plant In Vitro Culture with Machine Learning Technologies for Maximizing the Production of Phenolic Compounds
Source: PubMed Central journal article supplement (PMC7139750; doi:10.3390/antiox9030210), 2020-03-04
Supplement: antioxidants-09-00210-s001.pdf [file antioxidants-09-00210-s001.pdf]

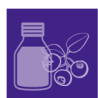**Table S1.** Salt composition of culture media used in this work.

|                | Salts                                                | MS (mg L <sup>-1</sup> ) | 1/2MS (mg L <sup>-1</sup> ) |
|----------------|------------------------------------------------------|--------------------------|-----------------------------|
| Macronutrients | KNO <sub>3</sub>                                     | 1900                     | 950                         |
|                | NH <sub>4</sub> NO <sub>3</sub>                      | 1650                     | 825                         |
|                | CaCl <sub>2</sub> · 2H <sub>2</sub> O                | 440                      | 220                         |
|                | MgSO <sub>4</sub> · 7H <sub>2</sub> O                | 370                      | 185                         |
|                | KH <sub>2</sub> PO <sub>4</sub>                      | 170                      | 85                          |
| Micronutrients | MnSO <sub>4</sub> · 4H <sub>2</sub> O                |                          | 22.3                        |
|                | ZnSO <sub>4</sub> · 7H <sub>2</sub> O                |                          | 8.6                         |
|                | H <sub>3</sub> BO <sub>3</sub>                       |                          | 6.2                         |
|                | KI                                                   |                          | 0.83                        |
|                | CuSO <sub>4</sub> · 5H <sub>2</sub> O                |                          | 0.025                       |
|                | Na <sub>2</sub> MoO <sub>4</sub> · 2H <sub>2</sub> O |                          | 0.25                        |
|                | CoCl <sub>2</sub> · 6H <sub>2</sub> O                |                          | 0.025                       |
|                | Na <sub>2</sub> EDTA                                 |                          | 37.25                       |
|                | FeSO <sub>4</sub> · 7H <sub>2</sub> O                |                          | 27.85                       |

**Table S2.** Dataset used for the construction of ANN model. Inputs: “Gen” refers to genotype, “A” stands for “Aerial parts” and “R” stands for “Roots”. Outputs: TPC, FC and RSA are expressed as the mean ± standard deviation of three independent extracts.

| Genot. | Organ | Solvent | Inputs                       |                              |                |                 |                  |                  |                                |                               | Outputs    |            |            |
|--------|-------|---------|------------------------------|------------------------------|----------------|-----------------|------------------|------------------|--------------------------------|-------------------------------|------------|------------|------------|
|        |       |         | NO <sub>3</sub> <sup>-</sup> | NH <sub>4</sub> <sup>+</sup> | K <sup>+</sup> | Cl <sup>-</sup> | Ca <sup>2+</sup> | Mg <sup>2+</sup> | HPO <sub>4</sub> <sup>2-</sup> | SO <sub>4</sub> <sup>2-</sup> | TPC        | FC         | RSA        |
| BH     | A     | M40     | 39.4                         | 20.6                         | 20.0           | 5.99            | 2.99             | 1.50             | 1.25                           | 1.76                          | 11.0 ± 0.2 | 0.8 ± 0.02 | 4.1 ± 0.2  |
| BH     | A     | M60     | 39.4                         | 20.6                         | 20.0           | 5.99            | 2.99             | 1.50             | 1.25                           | 1.76                          | 17.1 ± 0.6 | 1.2 ± 0.1  | 2.8 ± 0.2  |
| BH     | A     | M80     | 39.4                         | 20.6                         | 20.0           | 5.99            | 2.99             | 1.50             | 1.25                           | 1.76                          | 22.5 ± 0.6 | 5.6 ± 0.3  | 2.0 ± 0.1  |
| BH     | A     | M100    | 39.4                         | 20.6                         | 20.0           | 5.99            | 2.99             | 1.50             | 1.25                           | 1.76                          | 15.1 ± 0.2 | 9.2 ± 0.2  | 3.8 ± 0.1  |
| BH     | A     | M40     | 19.7                         | 10.3                         | 10.0           | 2.99            | 1.50             | 0.75             | 0.62                           | 1.01                          | 22.0 ± 0.8 | 1.0 ± 0.1  | 2.6 ± 0.04 |
| BH     | A     | M60     | 19.7                         | 10.3                         | 10.0           | 2.99            | 1.50             | 0.75             | 0.62                           | 1.01                          | 37.6 ± 1.4 | 1.8 ± 0.1  | 1.2 ± 0.01 |
| BH     | A     | M80     | 19.7                         | 10.3                         | 10.0           | 2.99            | 1.50             | 0.75             | 0.62                           | 1.01                          | 50.0 ± 1.7 | 5.9 ± 0.1  | 0.8 ± 0.07 |
| BH     | A     | M100    | 19.7                         | 10.3                         | 10.0           | 2.99            | 1.50             | 0.75             | 0.62                           | 1.01                          | 30.8 ± 0.8 | 9.9 ± 0.2  | 1.5 ± 0.1  |
| BH     | R     | M40     | 39.4                         | 20.6                         | 20.0           | 5.99            | 2.99             | 1.50             | 1.25                           | 1.76                          | 7.1 ± 0.3  | 0.4 ± 0.03 | 8.1 ± 0.1  |
| BH     | R     | M60     | 39.4                         | 20.6                         | 20.0           | 5.99            | 2.99             | 1.50             | 1.25                           | 1.76                          | 14.0 ± 0.2 | 0.7 ± 0.02 | 4.2 ± 0.1  |

|    |   |      |      |      |      |      |      |      |      |      |                |                 |                |
|----|---|------|------|------|------|------|------|------|------|------|----------------|-----------------|----------------|
| BH | R | M80  | 39.4 | 20.6 | 20.0 | 5.99 | 2.99 | 1.50 | 1.25 | 1.76 | $8.9 \pm 0.3$  | $1.5 \pm 0.1$   | $5.0 \pm 0.1$  |
| BH | R | M100 | 39.4 | 20.6 | 20.0 | 5.99 | 2.99 | 1.50 | 1.25 | 1.76 | $9.3 \pm 0.2$  | $1.8 \pm 0.1$   | $6.0 \pm 0.03$ |
| BH | R | M40  | 19.7 | 10.3 | 10.0 | 2.99 | 1.50 | 0.75 | 0.62 | 1.01 | $14.1 \pm 0.5$ | $0.9 \pm 0.02$  | $3.5 \pm 0.1$  |
| BH | R | M60  | 19.7 | 10.3 | 10.0 | 2.99 | 1.50 | 0.75 | 0.62 | 1.01 | $14.9 \pm 0.5$ | $0.9 \pm 0.04$  | $3.8 \pm 0.1$  |
| BH | R | M80  | 19.7 | 10.3 | 10.0 | 2.99 | 1.50 | 0.75 | 0.62 | 1.01 | $13.4 \pm 0.3$ | $1.6 \pm 0.1$   | $3.7 \pm 0.04$ |
| BH | R | M100 | 19.7 | 10.3 | 10.0 | 2.99 | 1.50 | 0.75 | 0.62 | 1.01 | $11.8 \pm 0.3$ | $1.7 \pm 0.04$  | $5.2 \pm 0.1$  |
| BD | A | M40  | 39.4 | 20.6 | 20.0 | 5.99 | 2.99 | 1.50 | 1.25 | 1.76 | $8.3 \pm 0.2$  | $1.8 \pm 0.1$   | $5.4 \pm 0.2$  |
| BD | A | M60  | 39.4 | 20.6 | 20.0 | 5.99 | 2.99 | 1.50 | 1.25 | 1.76 | $20.8 \pm 0.5$ | $3.9 \pm 0.1$   | $2.7 \pm 0.03$ |
| BD | A | M80  | 39.4 | 20.6 | 20.0 | 5.99 | 2.99 | 1.50 | 1.25 | 1.76 | $19.9 \pm 0.5$ | $10.2 \pm 0.4$  | $2.7 \pm 0.1$  |
| BD | A | M100 | 39.4 | 20.6 | 20.0 | 5.99 | 2.99 | 1.50 | 1.25 | 1.76 | $18.3 \pm 0.5$ | $16.0 \pm 0.3$  | $3.2 \pm 0.03$ |
| BD | A | M40  | 19.7 | 10.3 | 10.0 | 2.99 | 1.50 | 0.75 | 0.62 | 1.01 | $14.4 \pm 0.4$ | $2.7 \pm 0.1$   | $3.7 \pm 0.1$  |
| BD | A | M60  | 19.7 | 10.3 | 10.0 | 2.99 | 1.50 | 0.75 | 0.62 | 1.01 | $23.6 \pm 0.3$ | $3.7 \pm 0.1$   | $2.0 \pm 0.1$  |
| BD | A | M80  | 19.7 | 10.3 | 10.0 | 2.99 | 1.50 | 0.75 | 0.62 | 1.01 | $31.1 \pm 0.7$ | $7.3 \pm 0.2$   | $1.6 \pm 0.05$ |
| BD | A | M100 | 19.7 | 10.3 | 10.0 | 2.99 | 1.50 | 0.75 | 0.62 | 1.01 | $25.3 \pm 0.2$ | $15.8 \pm 0.4$  | $2.3 \pm 0.1$  |
| BD | R | M40  | 39.4 | 20.6 | 20.0 | 5.99 | 2.99 | 1.50 | 1.25 | 1.76 | $10.2 \pm 0.6$ | $0.4 \pm 0.01$  | $5.0 \pm 0.2$  |
| BD | R | M60  | 39.4 | 20.6 | 20.0 | 5.99 | 2.99 | 1.50 | 1.25 | 1.76 | $19.5 \pm 0.5$ | $1.0 \pm 0.03$  | $2.6 \pm 0.1$  |
| BD | R | M80  | 39.4 | 20.6 | 20.0 | 5.99 | 2.99 | 1.50 | 1.25 | 1.76 | $16.0 \pm 0.4$ | $1.4 \pm 0.04$  | $3.3 \pm 0.1$  |
| BD | R | M100 | 39.4 | 20.6 | 20.0 | 5.99 | 2.99 | 1.50 | 1.25 | 1.76 | $13.5 \pm 0.4$ | $2.8 \pm 0.1$   | $4.6 \pm 0.1$  |
| BD | R | M40  | 19.7 | 10.3 | 10.0 | 2.99 | 1.50 | 0.75 | 0.62 | 1.01 | $10.7 \pm 0.4$ | $0.6 \pm 0.1$   | $4.4 \pm 0.2$  |
| BD | R | M60  | 19.7 | 10.3 | 10.0 | 2.99 | 1.50 | 0.75 | 0.62 | 1.01 | $19.6 \pm 0.7$ | $1.1 \pm 0.04$  | $2.4 \pm 0.1$  |
| BD | R | M80  | 19.7 | 10.3 | 10.0 | 2.99 | 1.50 | 0.75 | 0.62 | 1.01 | $16.5 \pm 0.2$ | $2.9 \pm 0.1$   | $3.0 \pm 0.1$  |
| BD | R | M100 | 19.7 | 10.3 | 10.0 | 2.99 | 1.50 | 0.75 | 0.62 | 1.01 | $13.6 \pm 0.5$ | $2.6 \pm 0.1$   | $4.0 \pm 0.1$  |
| BT | A | M40  | 39.4 | 20.6 | 20.0 | 5.99 | 2.99 | 1.50 | 1.25 | 1.76 | $7.7 \pm 0.3$  | $0.4 \pm 0.02$  | $5.6 \pm 0.1$  |
| BT | A | M60  | 39.4 | 20.6 | 20.0 | 5.99 | 2.99 | 1.50 | 1.25 | 1.76 | $17.7 \pm 1.1$ | $1.5 \pm 0.02$  | $2.6 \pm 0.1$  |
| BT | A | M80  | 39.4 | 20.6 | 20.0 | 5.99 | 2.99 | 1.50 | 1.25 | 1.76 | $12.5 \pm 0.7$ | $5.4 \pm 0.3$   | $4.0 \pm 0.2$  |
| BT | A | M100 | 39.4 | 20.6 | 20.0 | 5.99 | 2.99 | 1.50 | 1.25 | 1.76 | $10.5 \pm 0.2$ | $9.3 \pm 0.4$   | $4.5 \pm 0.1$  |
| BT | A | M40  | 19.7 | 10.3 | 10.0 | 2.99 | 1.50 | 0.75 | 0.62 | 1.01 | $17.1 \pm 0.3$ | $0.5 \pm 0.002$ | $3.1 \pm 0.1$  |
| BT | A | M60  | 19.7 | 10.3 | 10.0 | 2.99 | 1.50 | 0.75 | 0.62 | 1.01 | $25.6 \pm 0.8$ | $1.4 \pm 0.03$  | $1.7 \pm 0.01$ |
| BT | A | M80  | 19.7 | 10.3 | 10.0 | 2.99 | 1.50 | 0.75 | 0.62 | 1.01 | $15.7 \pm 1.0$ | $7.4 \pm 0.1$   | $3.3 \pm 0.1$  |
| BT | A | M100 | 19.7 | 10.3 | 10.0 | 2.99 | 1.50 | 0.75 | 0.62 | 1.01 | $14.4 \pm 0.3$ | $9.7 \pm 0.2$   | $4.3 \pm 0.2$  |
| BT | R | M40  | 39.4 | 20.6 | 20.0 | 5.99 | 2.99 | 1.50 | 1.25 | 1.76 | $9.4 \pm 0.3$  | $0.5 \pm 0.04$  | $5.4 \pm 0.1$  |
| BT | R | M60  | 39.4 | 20.6 | 20.0 | 5.99 | 2.99 | 1.50 | 1.25 | 1.76 | $11.6 \pm 0.2$ | $0.7 \pm 0.01$  | $5.0 \pm 0.1$  |
| BT | R | M80  | 39.4 | 20.6 | 20.0 | 5.99 | 2.99 | 1.50 | 1.25 | 1.76 | $9.2 \pm 0.3$  | $1.5 \pm 0.02$  | $5.6 \pm 0.1$  |
| BT | R | M100 | 39.4 | 20.6 | 20.0 | 5.99 | 2.99 | 1.50 | 1.25 | 1.76 | $7.3 \pm 0.2$  | $1.6 \pm 0.1$   | $9.3 \pm 0.4$  |
| BT | R | M40  | 19.7 | 10.3 | 10.0 | 2.99 | 1.50 | 0.75 | 0.62 | 1.01 | $13.2 \pm 0.1$ | $0.9 \pm 0.1$   | $3.8 \pm 0.1$  |
| BT | R | M60  | 19.7 | 10.3 | 10.0 | 2.99 | 1.50 | 0.75 | 0.62 | 1.01 | $15.0 \pm 0.3$ | $1.0 \pm 0.01$  | $3.3 \pm 0.1$  |
| BT | R | M80  | 19.7 | 10.3 | 10.0 | 2.99 | 1.50 | 0.75 | 0.62 | 1.01 | $13.3 \pm 0.1$ | $1.6 \pm 0.05$  | $3.5 \pm 0.1$  |
| BT | R | M100 | 19.7 | 10.3 | 10.0 | 2.99 | 1.50 | 0.75 | 0.62 | 1.01 | $10.7 \pm 0.5$ | $2.1 \pm 0.01$  | $5.6 \pm 0.3$  |

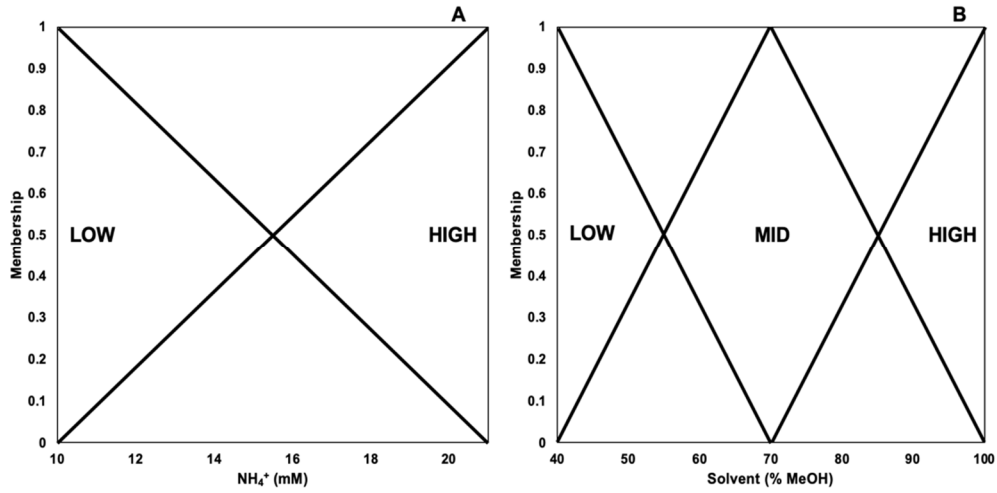

**Figure S1.** Graphical interpretation of input levels ranged by neurofuzzy logic on TPC modelling: (A)  $\text{NH}_4^+$  concentration, expressed in mM; (B) Methanol proportion in the solvent, expressed as % MeOH.

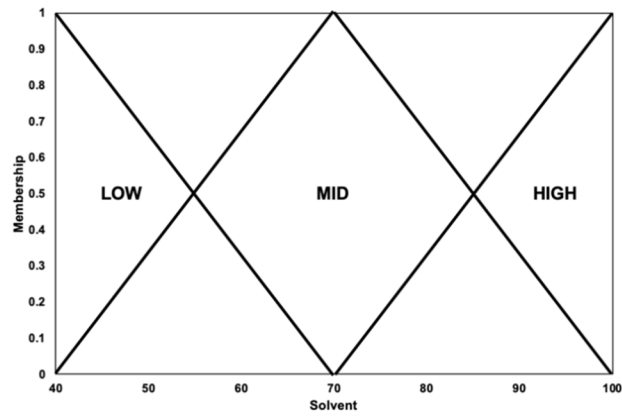

**Figure S2.** Graphical interpretation of solvent levels ranged by neurofuzzy logic on FC modelling. Results were expressed as % MeOH.

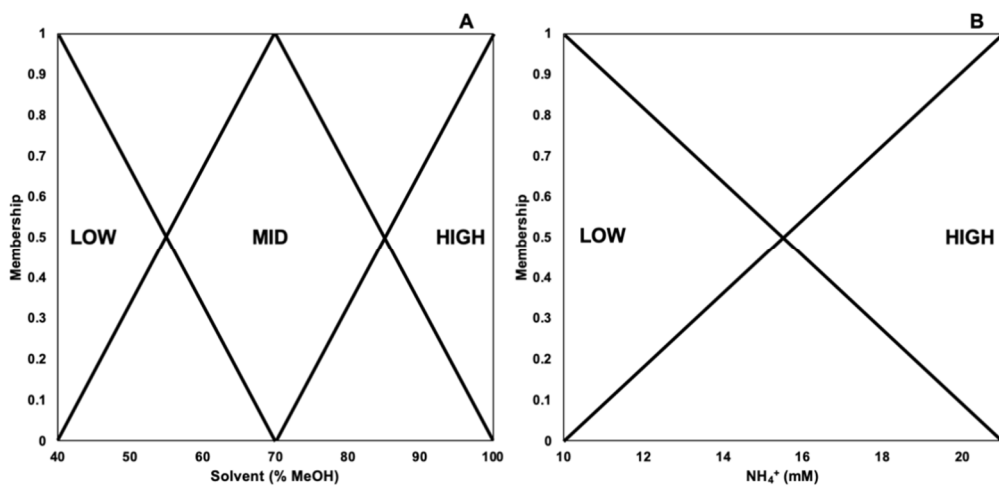

**Figure S3.** Graphical interpretation of input levels ranged by neurofuzzy logic on RSA modelling: (A) Methanol proportion in the solvent, expressed as % MeOH; (B)  $\text{NH}_4^+$  concentration, expressed in mM.
